# Supplementary material
Source: PubMed Central journal article supplement (PMC2895995)
Supplement: NIHMS189162-supplement-1.pdf [file NIHMS189162-supplement-1.pdf]

# **Sustained signaling by canonical T helper cytokines throughout the reactive lymph node**

**Georgia Perona-Wright, Katja Mohrs and Markus Mohrs**

*Trudeau Institute, Saranac Lake, NY 12983, USA*

**Supplementary figures S1 - S9**

**Figure S1**

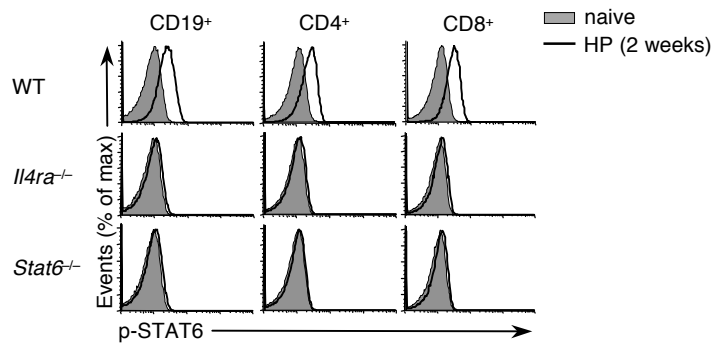

**Supplementary Figure 1. Absence of STAT6 phosphorylation in naïve mice.** Wild-type, *Il4ra*<sup>-/-</sup> and *Stat6*<sup>-/-</sup> mice were infected or not with *H. polygyrus* (HP) and, 2 weeks later, STAT6 phosphorylation in lymphocyte subsets of the mesLN was assessed by flow cytometry. Data are representative of four separate experiments using 3-5 mice per group.

**Figure S2**

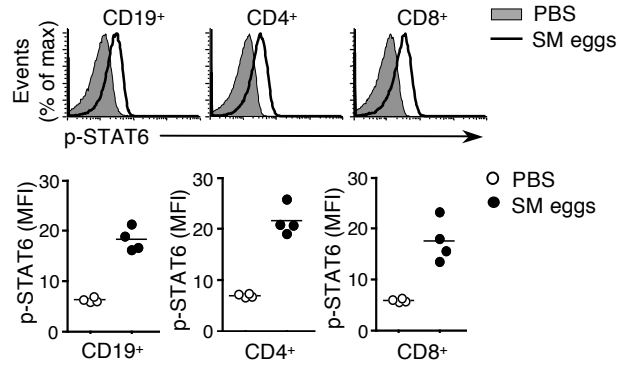

**Supplementary Figure 2. Ubiquitous STAT6 phosphorylation in the reactive lymph node is elicited in response to *Schistosoma mansoni*.** 4get mice were injected subcutaneously into the footpad with *S. mansoni* eggs (SM eggs) or PBS. 7 days later, draining popliteal lymph nodes were harvested and STAT6 phosphorylation was assessed by flow cytometry. Data shown are gated on GFP<sup>+</sup> cells and each data point represents an individual mouse. Data are representative of 4 mice per group in two independent experiments.

**Figure S3**

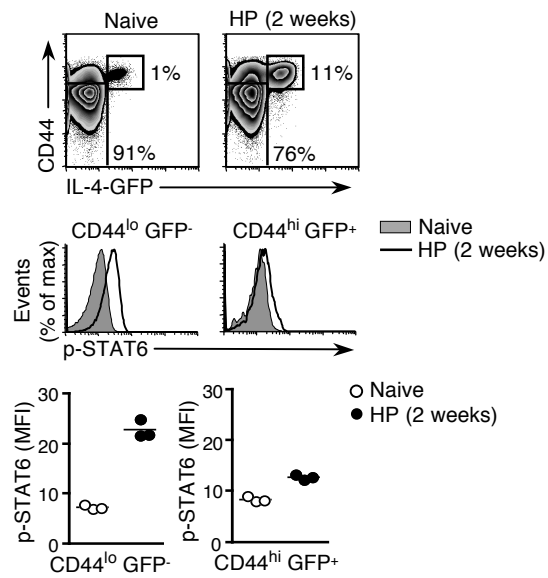

**Supplementary Figure 3. STAT6 phosphorylation in bystander CD4<sup>+</sup> cells in the Th2 reactive lymph node.** 4get mice were infected with *H. polygyrus* and mesLN cells harvested 2 weeks later. STAT6 phosphorylation was assessed by flow cytometry. Data shown are gated on CD4<sup>+</sup> cells and each data point represents an individual mouse. Data are representative of five independent experiments using 3-4 mice per group.

**Figure S4**

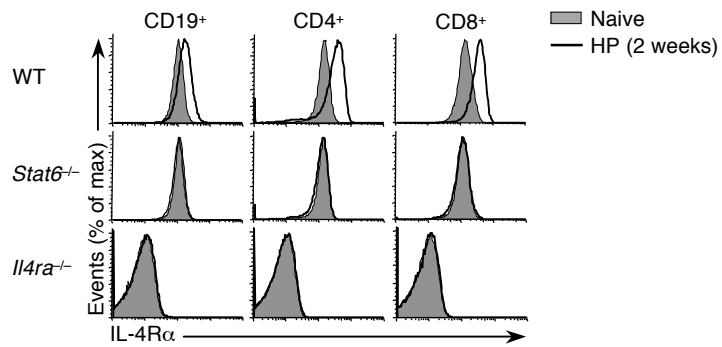

**Supplementary Figure 4. IL-4R $\alpha$  upregulation is STAT6 dependent.** WT, *Stat6*<sup>-/-</sup> and *Il4ra*<sup>-/-</sup> mice were infected or not with *H. polygyrus* and, 2 weeks later, IL-4R $\alpha$  expression on lymphocyte subsets of the mesLN was measured by flow cytometry. Data are representative of four separate experiments with 3-5 mice per group.

**Figure S5**

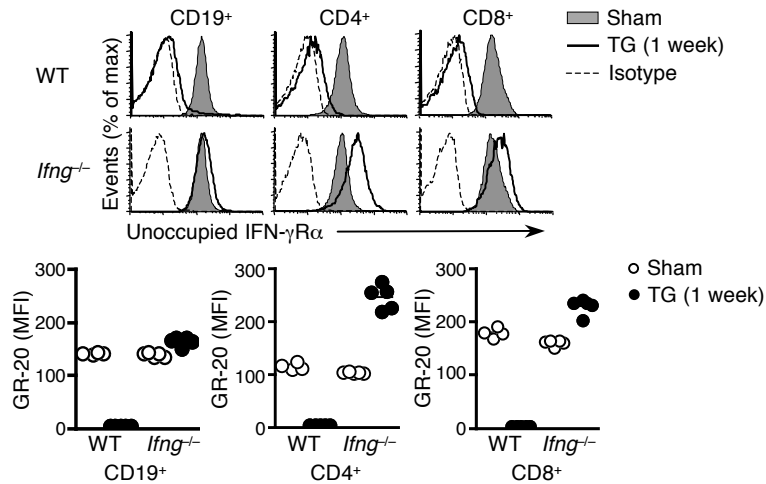

**Supplementary Figure 5. In the absence of IFN- $\gamma$ , GR-20 staining is not reduced by *T. gondii* infection.** Lymphocytes from mesLN of *T. gondii*- or sham-infected wild-type and *Ifng*<sup>-/-</sup> mice were stained with the GR-20 mAb, whose binding to the IFN- $\gamma$  receptor  $\alpha$  chain is blocked by receptor ligation of IFN- $\gamma$ . Data shown is gated on the indicated lymphocyte subsets. An isotype control antibody was used as a negative staining control. Each data point represents an individual mouse. Data are representative of two independent experiments with 4-5 mice per group.

**Figure S6**

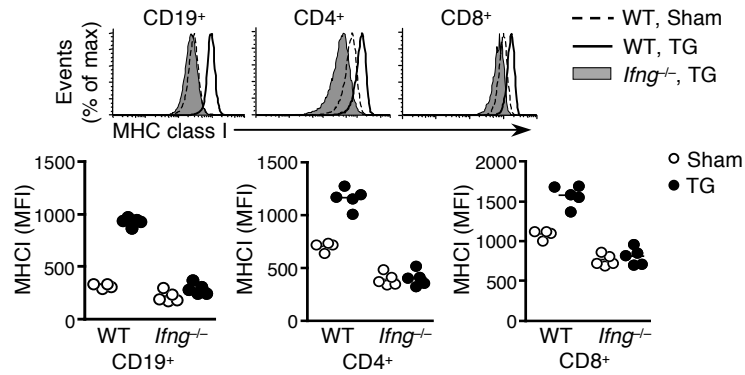

**Supplementary Figure 6. MHC class I upregulation in a Th1 reactive lymph node is IFN- $\gamma$  dependent.** MHC class I (H-2K<sup>b</sup>) expression on lymphocyte subsets of WT and *Ifng*<sup>-/-</sup> mesLN, 1 week after *T. gondii*- or sham- infection. Graphed data depict the geometric mean fluorescence intensity (MFI) and each data point represents an individual mouse. Data are representative of four separate experiments using 4-5 mice per group.

**Figure S7**

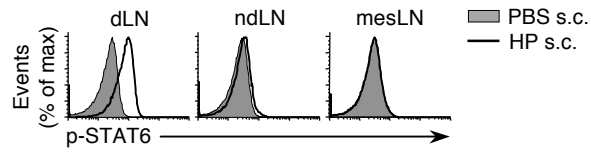

**Supplementary Figure 7. STAT6 can be phosphorylated in a Th2 reactive lymph node distinct from the mesLN.** 4get mice were immunized subcutaneously into the footpad with *H. polygyrus* larvae or PBS. 7 days later, the draining popliteal lymph nodes (dLN), the non-draining contralateral popliteal lymph nodes (ndLN) and mesenteric lymph nodes (mesLN) were harvested and STAT6 phosphorylation was assessed by flow cytometry. Data shown are gated on CD4<sup>+</sup> GFP<sup>-</sup> cells and are representative of 3 mice per group in each of three independent experiments.



**Figure S8**

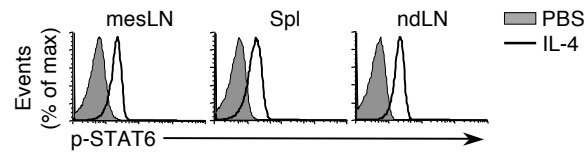

**Supplementary Figure 8. Exogenous IL-4 triggers systemic STAT6 phosphorylation in naïve mice.** Naïve 4get mice were injected intravenously with either recombinant murine IL-4 or a PBS carrier control and, 1 hour later, the indicated tissues harvested and assessed for STAT6 phosphorylation by flow cytometry. Data shown are gated on CD4<sup>+</sup> GFP<sup>-</sup> cells and are representative of two independent experiments.

**Figure S9**

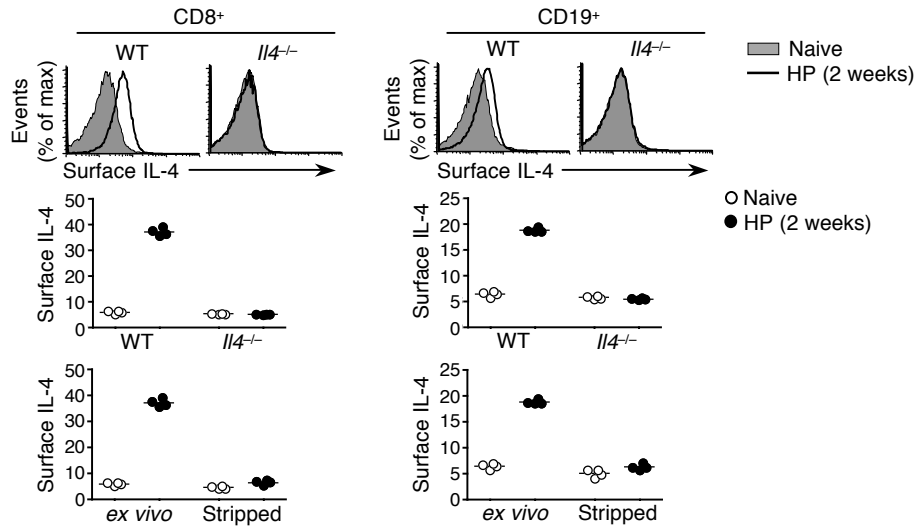

**Supplementary Figure 9. IL-4 binds to all CD8<sup>+</sup> and CD19<sup>+</sup> lymphocytes in the Th2 reactive lymph node.** mesLN cells were harvested from naïve or *H. polygyrus* - infected wild-type 4get or *Il4*<sup>-/-</sup> mice. IL-4 bound to the cell surface was detected using an anti-IL-4 antibody (clone BVD6) and assessed by flow cytometry either immediately or following incubation with an IL-4 neutralizing antibody (clone 11B11) for 60min (Stripped). Data shown are gated on CD8<sup>+</sup> or CD19<sup>+</sup> cells, as indicated. Each data point represents an individual mouse and all data are representative of three separate experiments with 4 mice per group.
